# Supplementary material
Source: Springer Nature journal article supplement (https://www.springermedizin.de/resource/supplementary/12969_2014_1726_MOESM2_ESM.pdf/9590654)

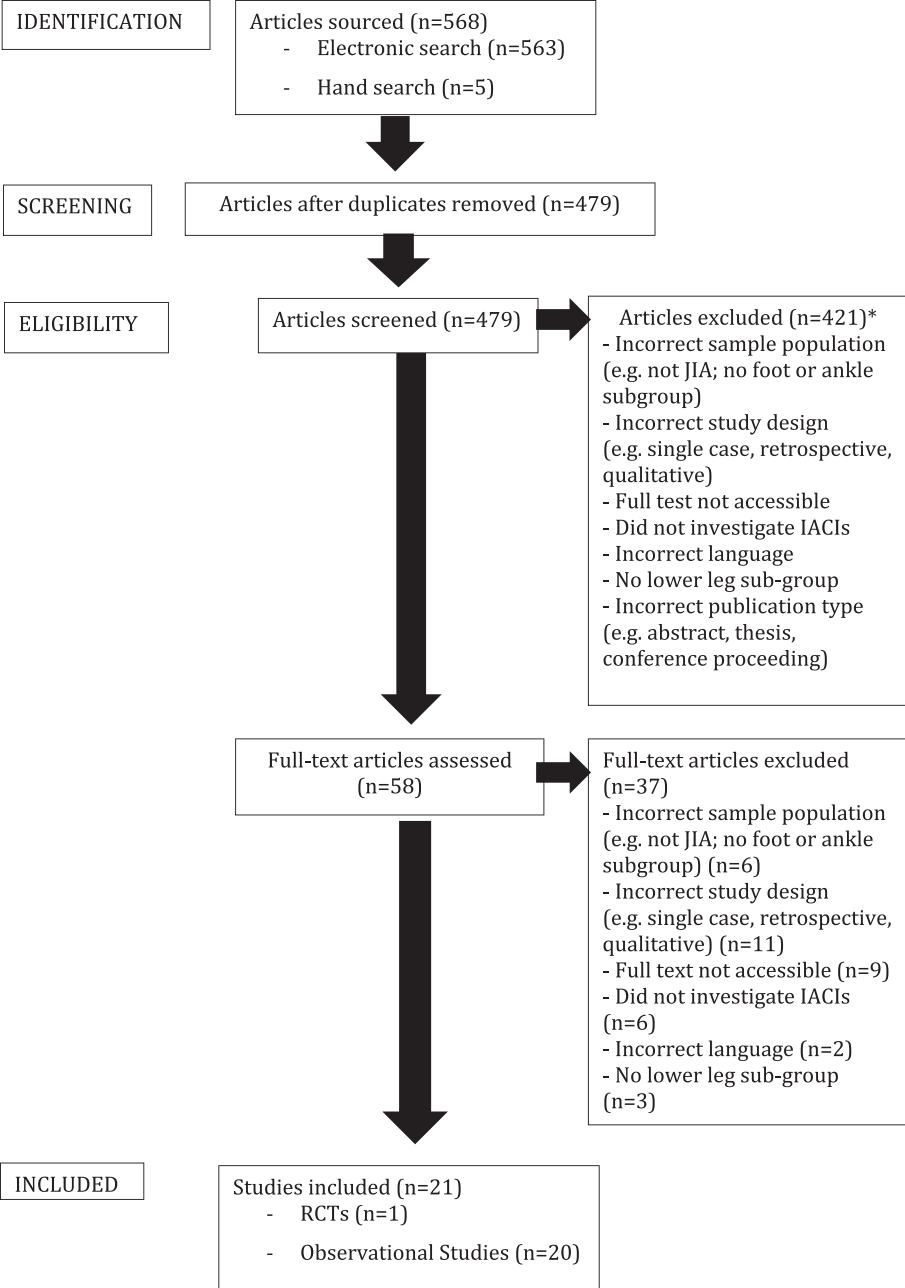

\* Studies may have been excluded for multiple reasons listed above

Supplement: MOESM2 [file 9590654]
